# Supplementary material for: Genomic functions of developmental pluripotency associated factor 4 (Dppa4) in pluripotent stem cells and cancer
Source: PubMed Central journal article supplement — Stem Cell Res. Author manuscript; Available in PMC 2018 Sep 12. (PMC6133722; doi:10.1016/j.scr.2018.07.009), 2018-07-19
Supplement: NIHMS982961-supplement-SuppMaterial.pdf [file NIHMS982961-supplement-SuppMaterial.pdf]

Supplemental Figure 1

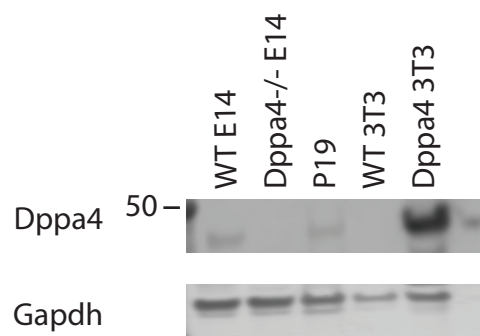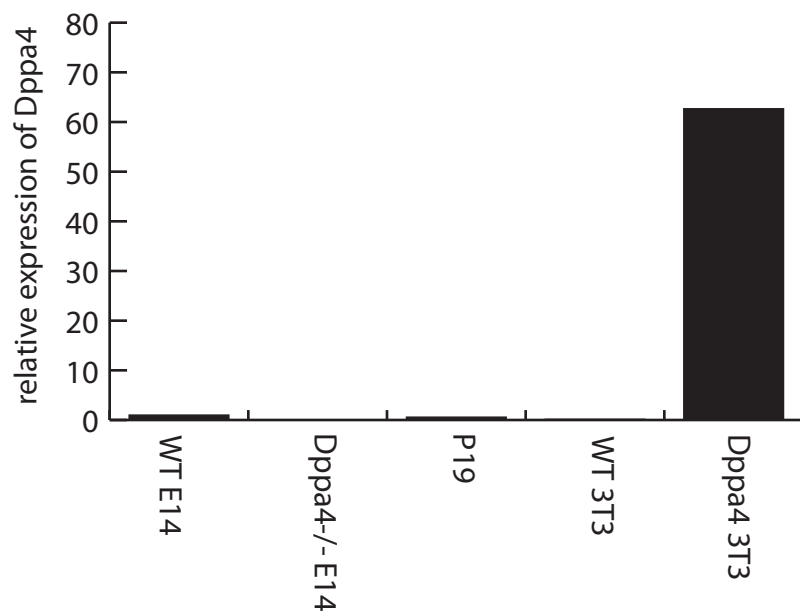

# Supplemental Figure 2

## A.

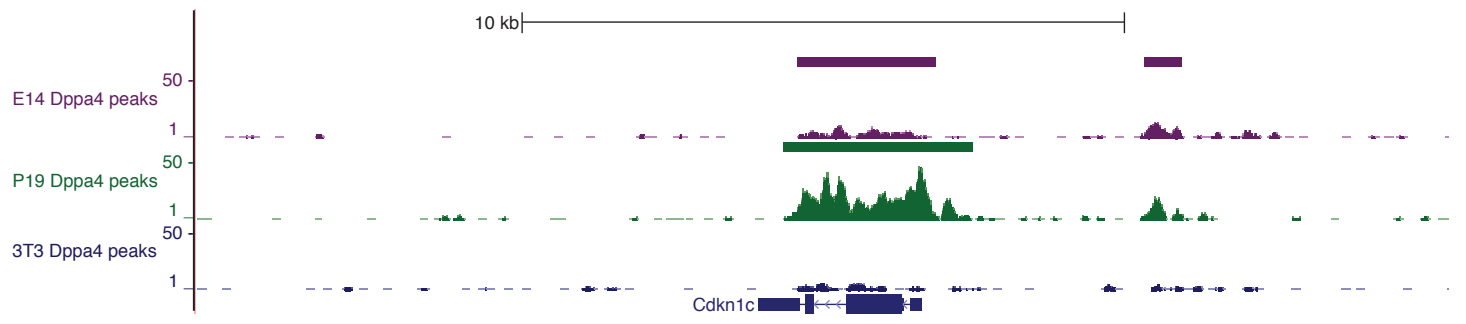

## B.

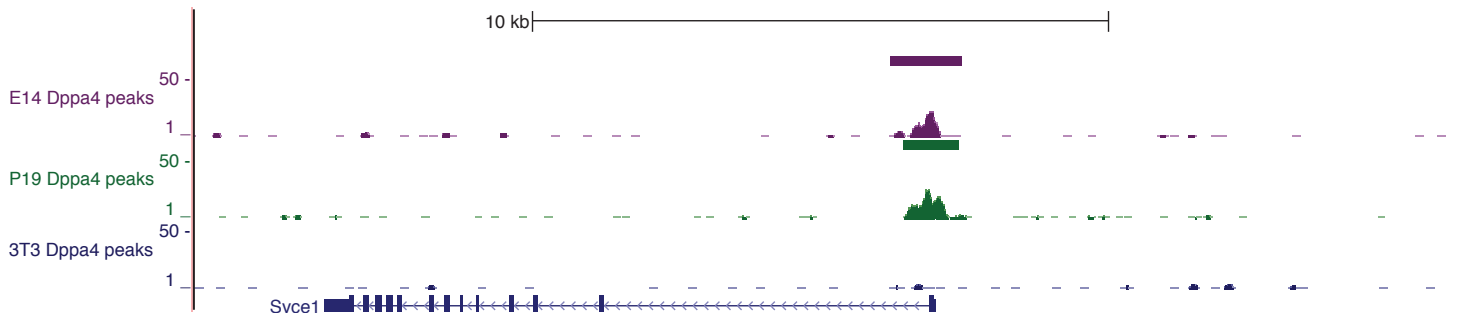

## C.

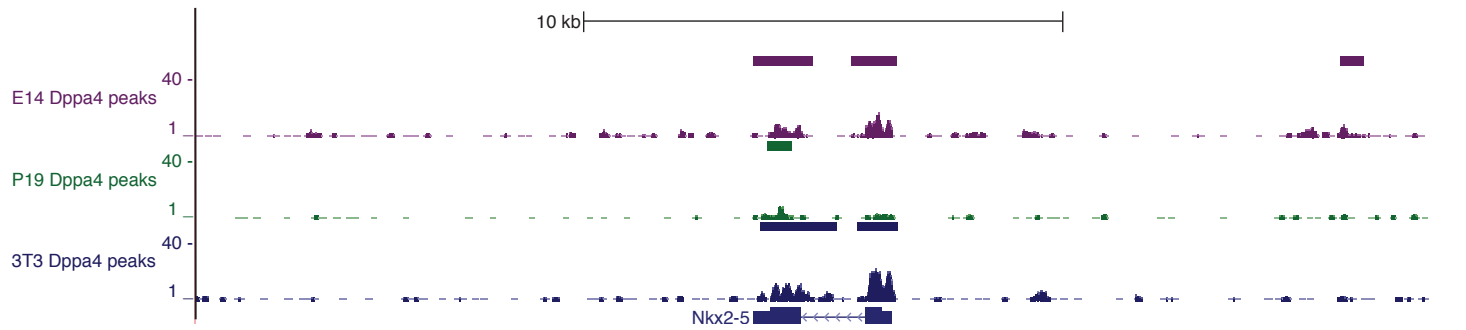

Supplemental Figure 3

**A.** Dppa4 and Dppa2 Overlap

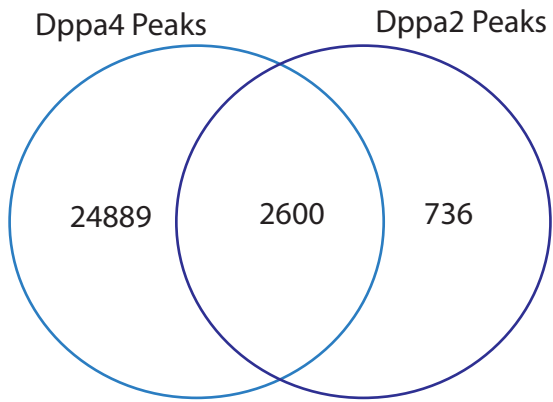

**B.** GO for Dppa4-Dppa2 Overlapping Targets

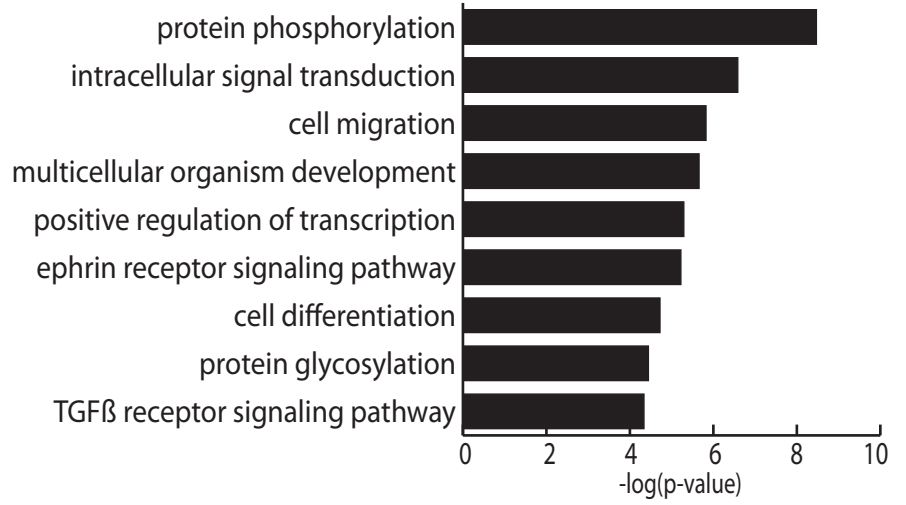

Supplemental Figure 4

A.

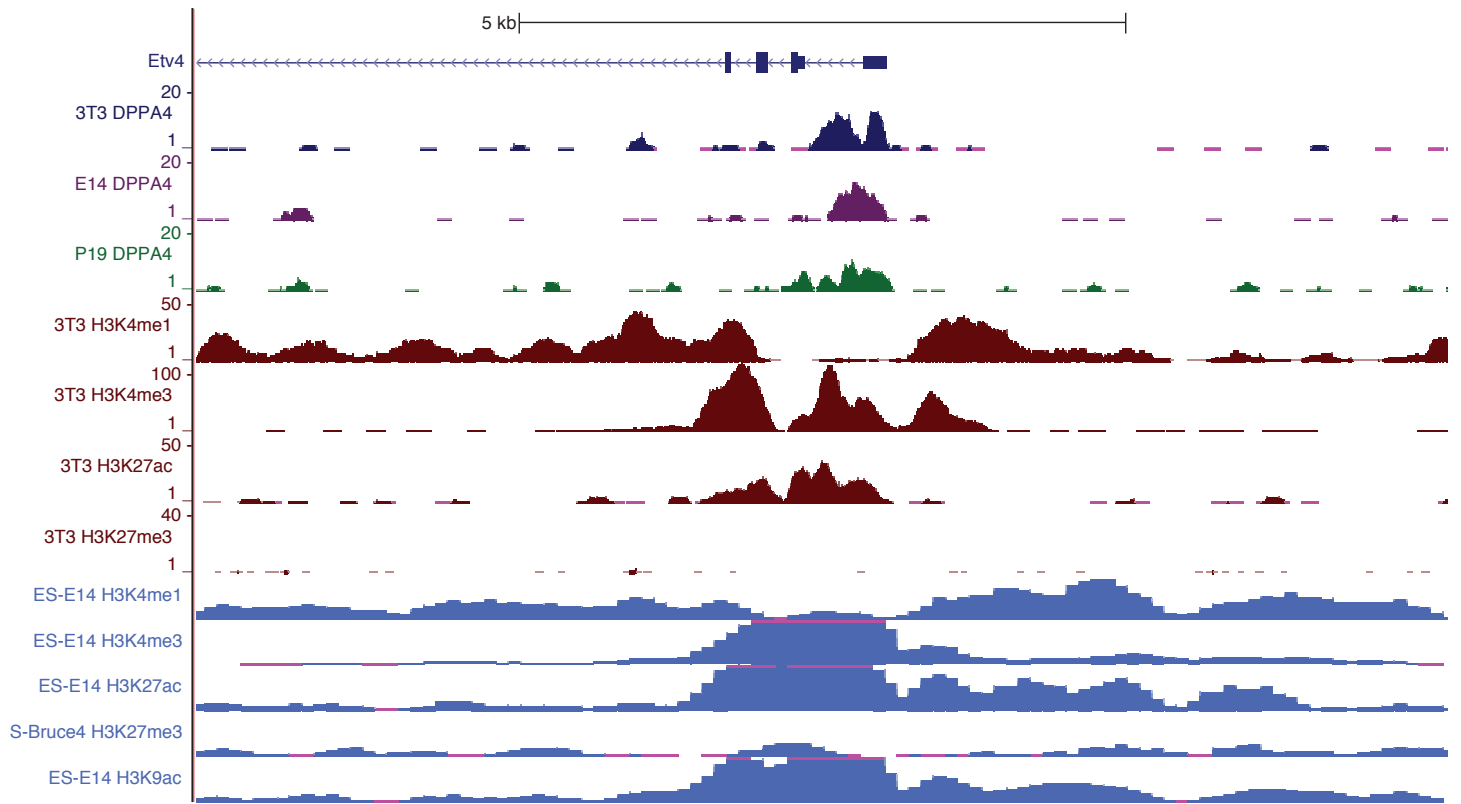

B.

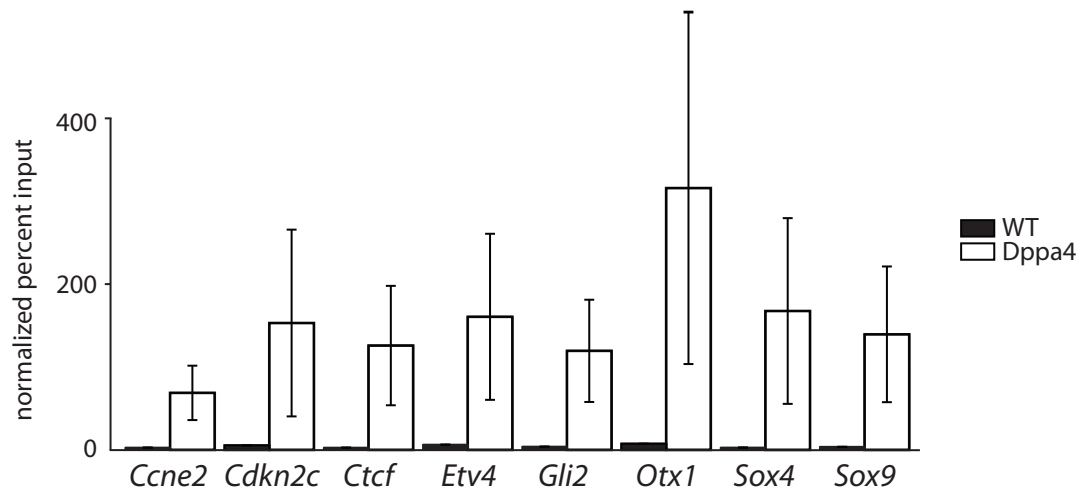

Supplemental Figure 5

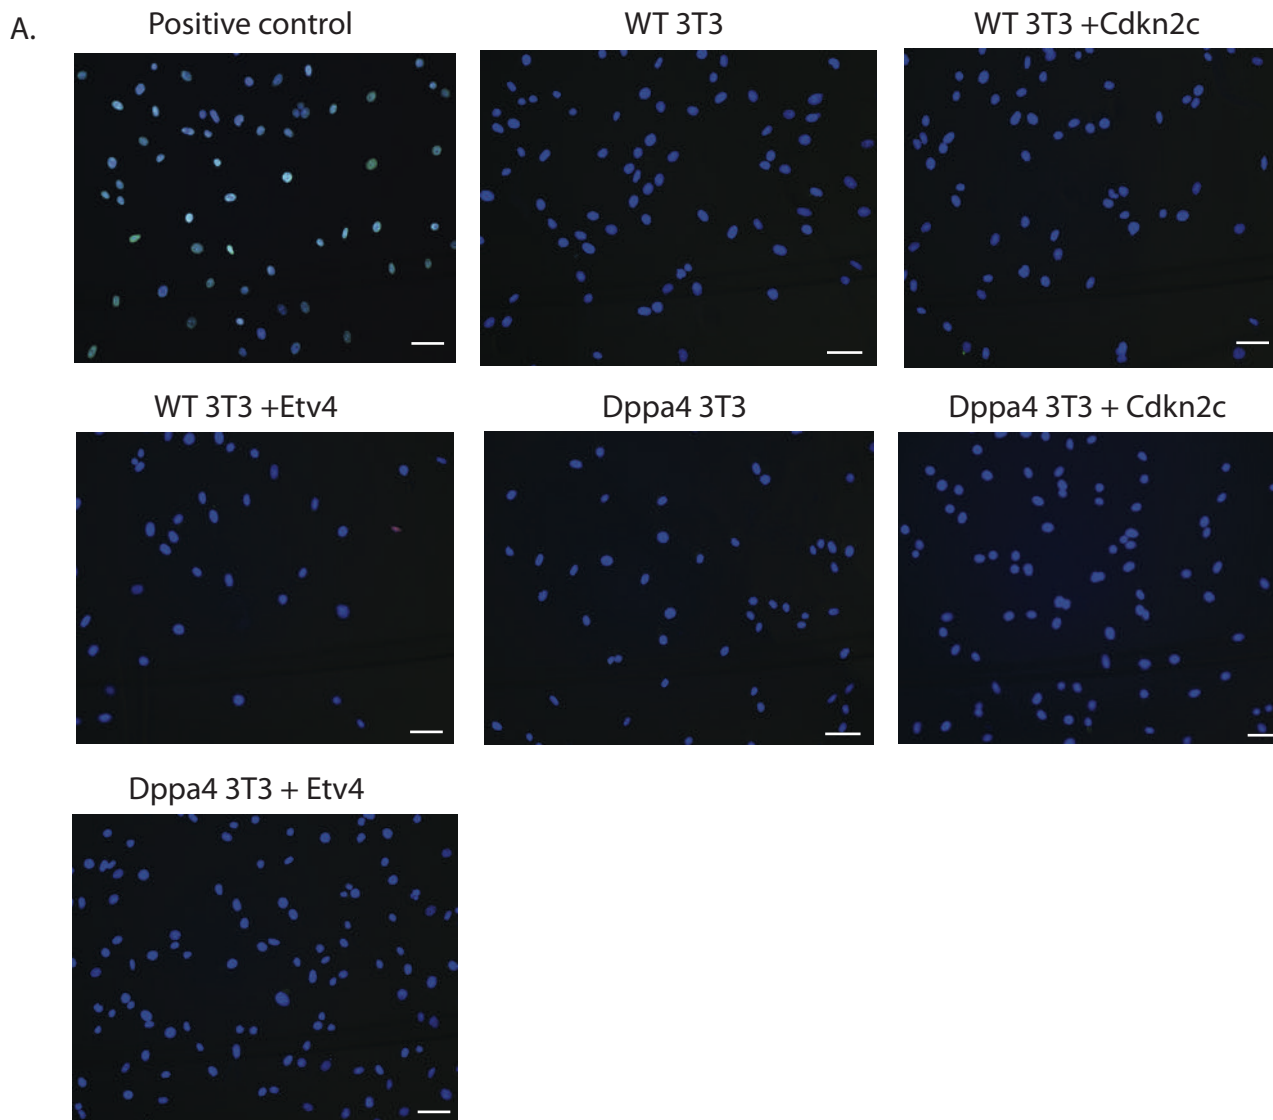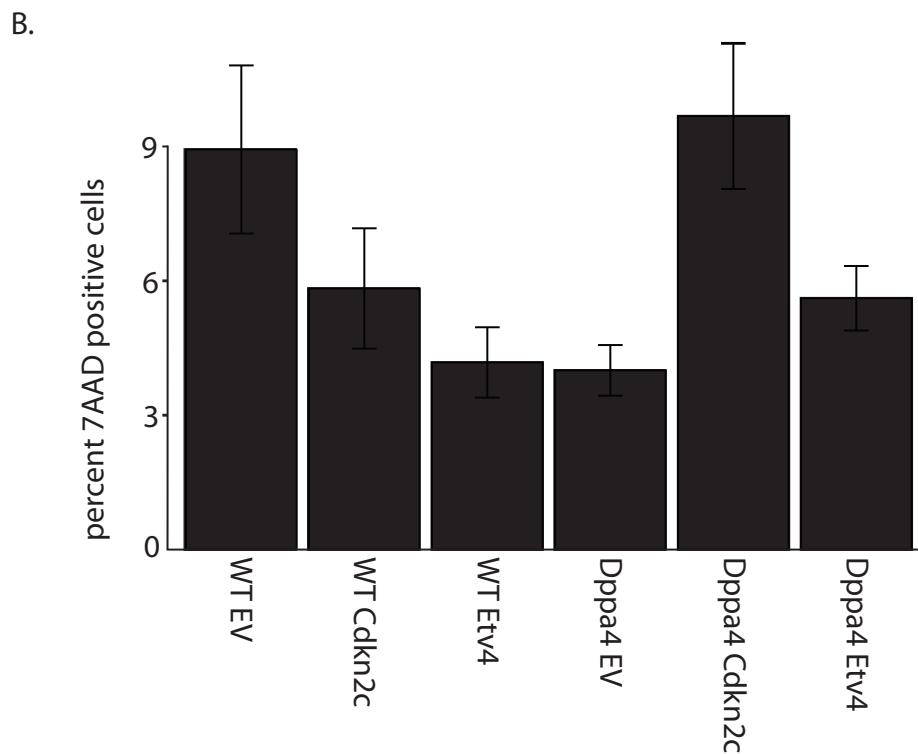

Supplemental Figure 6

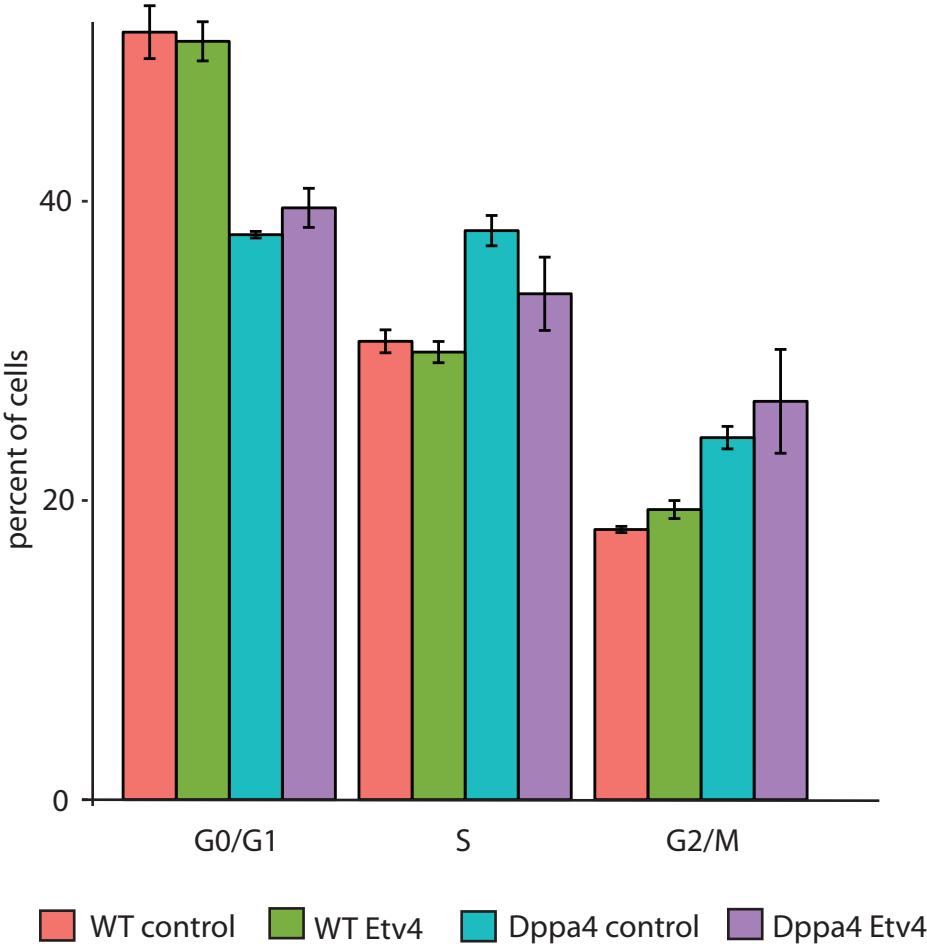

Supplemental Figure 7

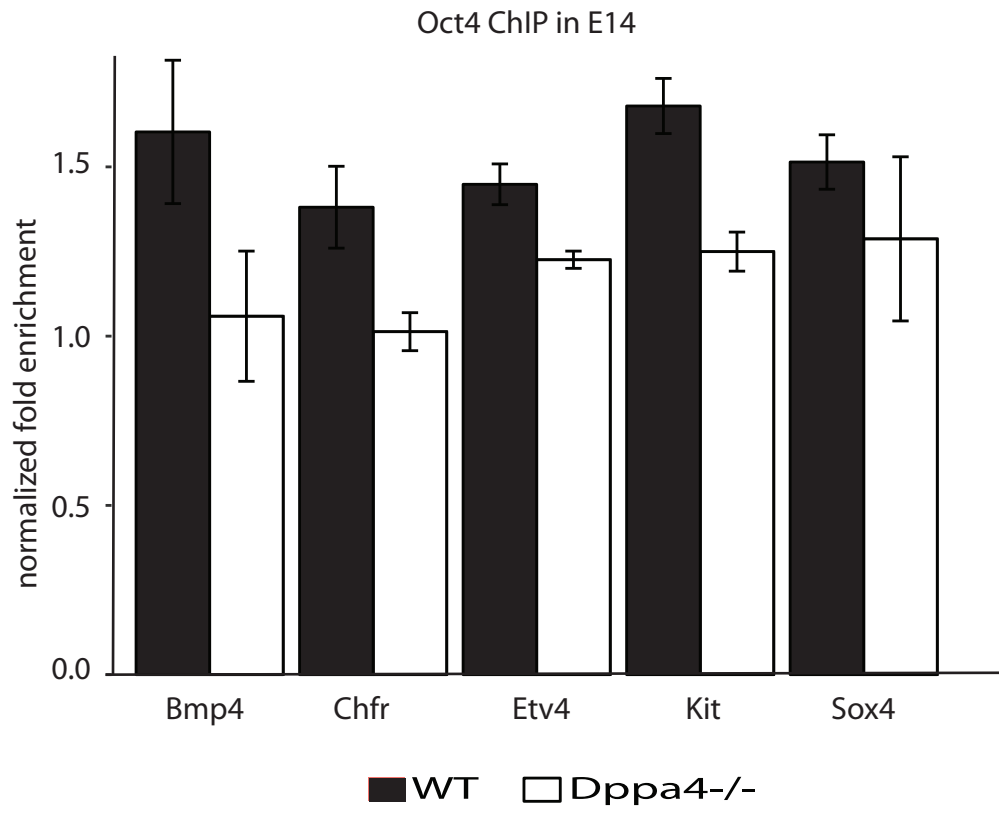

Supplemental Figure 8

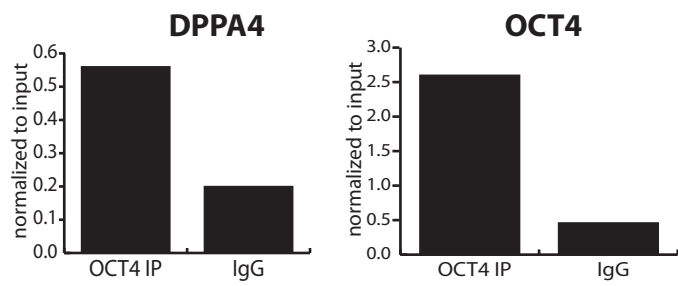



A.

**Oncogenesis**

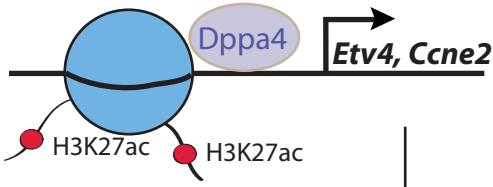

Proliferation, anchorage-independent growth, metastasis

**Pluripotency**

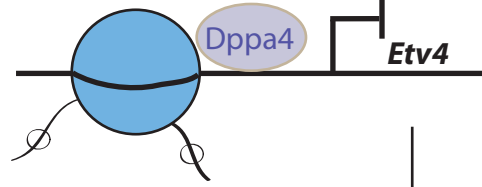

Modulated levels of proliferation

B.

**Pluripotency**

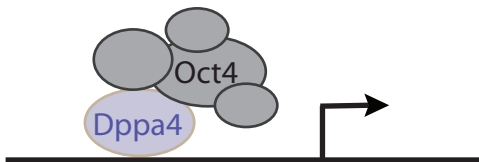

Other cell signaling and cancer targets

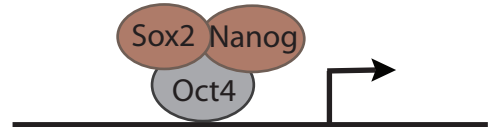

Core Pluripotency Targets

**Supplemental Table 1. List of Primer Sequences.**

| <b>Mouse ChIP primers</b> | <b>Sequence</b>        |
|---------------------------|------------------------|
| mSox4 chip f              | GACTGCTCCATGATCTTGCG   |
| mSox4 chip r              | GAGAACACTGAGGCTCTGCT   |
| mPtch1 chip f             | CGCCTTCCATTGCCACATT    |
| mPtch1 chip r             | CTTCCCGCGAGCTGGATG     |
| mPtch1 2 chip f           | TCATCACAGTGCGCACAAC    |
| mPtch1 2 chip r           | AGGAATGTACTACGGCGTGT   |
| mCtcf chip f              | TCTTCCCTTATCAGCACCCG   |
| mCtcf chip r              | CGGTTTAATCGCTCCACAGG   |
| mEtv4 chip f              | GGATCGGACAGCGAACTTC    |
| mEtv4 chip r              | CGCACACACAGTCTTATGT    |
| mEtv4 2 chip f            | GTGTGTGTGTGTATGTGGGC   |
| mEtv4 2 chip r            | ACCACACTCTCTGTTCGG     |
| mCcne2 chip f             | TCCGGCGTGTTCATTCTG     |
| mCcne2 chip r             | GGAACCCCAAGTCTCCTCAG   |
| mCdk5r1 chip f            | CTGGTTGGATTCTGCTGC     |
| mCdk5r1 chip r            | CGGATCTGCGTGGAACAA     |
| mCdk5- chip f             | TAAGCAGTTAGGTGGCGGAG   |
| mCdk5- chip r             | TTTCTCCAGTCCACTCCC     |
| mChIP Cdkn2c F            | TGTGCCGTTTTCTTATCCCT   |
| mChIP Cdkn2c R            | GCCTCCTTAAACTCTGCCG    |
| mChIP Cdkn2c 2F           | TTTCCATCCGTCTAGCCGAA   |
| mChIP Cdkn2c 2R           | TCGTCTTTAACCTCCCGAG    |
| mChIP Kit F               | ATCTGCTCTGCGTCCTGTT    |
| mChIP Kit R               | AGGTGGTAGGCATGGGAAAA   |
| mChIP Rnf17 F             | TCCAGGATAAAAGCCCAGCA   |
| mChIP Rnf17 R             | CGCGTCAAGAACCAATCACA   |
| mChIP Chfr F              | GGCAACAAGGTGCACATTCT   |
| mChIP Chfr R              | CTAGAGCGGTGCCAGAAAAG   |
| mChIP Bmp4 F              | CGAATGGCACTACGGAATGG   |
| mChIP Bmp4 R              | TGACTCCTAGGGGCTGGAA    |
| mChIP Negative control F  | GACTACTTACTGCTGGCTTCA  |
| mChIP Negative control R  | GTTAACCAAGACCAGTTTGCAT |
| mChIP Cbx2 F              | TCAGGCAGGAGTCTGGCTAT   |
| mChIP Cbx2 R              | TCCCACCCCTTAGATCTCCT   |
| mChIP Oct4 F              | GCACTTCTCTGGGGTCTCTG   |
| mChIP Oct4 R              | ACCCACCCGTCTAGAGTCCT   |
| mChIP Oct4 F1             | TGGTGAAGTCGATGAAGCTG   |
| mChIP Oct4 R1             | GAGCTGTTGGCTAGGGTCAG   |
| mChIP Nanog F             | ACCCAGGAAGAACCACTCCT   |
| mChIP Nanog R             | GTTTGCCGATCAGTCCTGT    |

|                           |                         |
|---------------------------|-------------------------|
| mChIP Sox9 F              | AGATAAGTTCCCCGTGTGCA    |
| mChIP Sox9 R              | TGACGTGTGGCTTGTTCTTG    |
| mChIP Gli2 F              | AGAAGGAAGACACGTGGGTT    |
| mChIP Gli2 R              | AGAAAGACCCCTCTCACTGC    |
| mChIP Gli3 F              | ATGTGTCTGTGTGAGGACCC    |
| mChIP Gli3 R              | CTTTGCTTTCCCGCTCCTTT    |
| mChIP Otx1 F              | CTCTGGGTCTAGGTTGGCAA    |
| mChIP Otx1 R              | GGTTATCCAGCAGCTTGACG    |
| mChIP Syce1 F             | AAGCAGTGTGTTGGCCAGTTT   |
| mChIP Syce1 R             | ATCACCGTTCTGTCTGAGGG    |
| <b>Mouse qPCR Primers</b> | <b>Sequence</b>         |
| mRT Dppa4 F               | GTCTAGTCAACCAAGCACGG    |
| mRT Dppa4 R               | CCTTTGCTGCTCACTCGTTT    |
| mRT Dppa4 F2              | CAAGAAGTGGAGCGCAGAAG    |
| mRT Dppa4 R2              | TTCCTACGAGTCTGTCCTGG    |
| mRT Chfr F                | GCAGACTTACCCTTTACAGAGC  |
| mRT Chfr R                | CCTGAGCAATCTTTGGTCACAT  |
| mRT Kit F                 | CTCCCCAACAGTGTATTAC     |
| mRT Kit R                 | TAGCCCGAAATCGCAAATCTT   |
| mRT Rnf17 F               | GACACACAGTCTAACAGAGGC   |
| mRT Rnf17 R               | TCATAGCTGCATCCAAATCACTT |
| mRT Bmp4 F                | TTCCTGGTAACCGAATGCTGA   |
| mRT Bmp4 R                | CCTGAATCTCGGCGACTTTTT   |
| mETV4 RT F                | CGGAGGATGAAAGGCGGATAC   |
| mETV4 RT R                | TCTTGGAAGTGACTGAGGTCC   |
| mEIF4B RT F               | ACGGACTTTCTAGCTGAGGAT   |
| mEIF4B RT R               | CGTCATCATCGTTACTATGCCAA |
| mCCNE2 RT F               | ATGTCAAGACGCAGCCGTTTA   |
| mCCNE2 RT R               | GCTGATTCCCTCCAGACAGTACA |
| mIRS2 RT F                | CTGCGTCCTCTCCCAAAGTG    |
| mIRS2 RT R                | GGGGTCATGGGCATGTAGC     |
| mCDK5 RT F                | CCCTGAGATTGTGAAGTCATTCC |
| mCDK5 RT R                | CCAATTTCAACTCCCCATTCTT  |
| mCDK5R1 F                 | CTGTCCCTATCCCCAGCTAT    |
| mCDK5R1 R                 | GGCAGCACCGAGATGATGG     |
| mSOX4 RT F                | CGGCTGCATCGTTCTCTCC     |
| mSOX4 RT R                | CGCTTCACTTTCTTGTCGGC    |
| mPTCH1 RT F               | AAAGAAGTGCAGCAAGTTTTTG  |

|              |                         |
|--------------|-------------------------|
| mPTCH1 RT R  | CTTCTCCTATCTTCTGACGGGT  |
| mRXRB RT F   | CAAACGGCTCTGTGCAATCTG   |
| mRXRB RT R   | GGTCAGGTCCTTCCGAATGG    |
| mCDKN1C RT F | GCAGGACGAGAATCAAGAGCA   |
| mCDKN1C RT R | GCTTGGCGAAGAAGTCGTT     |
| mCDKN2C RT F | CCTTGGGGGAACGAGTTGG     |
| mCDKN2C RT R | AAATTGGGATTAGCACCTCTGAG |
| mCTCF RT F   | GATCCTACCCTTCTCCAGATGAA |
| mCTCF RT R   | GTACCGTCACAGGAACAGGT    |
|              |                         |

**Supplemental Table 2. Overlap of Dppa4 binding and chromatin domains in 3T3 cells**

| <b>Chromatin Domain</b> | <b>Dppa4 Peaks</b> | <b>Random Regions</b> | <b>Fold Enrichment</b> |
|-------------------------|--------------------|-----------------------|------------------------|
| H3K4me3                 | 6216               | 130                   | 47.82                  |
| H3K4me1                 | 1817               | 437                   | 4.16                   |
| H3K27ac                 | 5572               | 178                   | 31.30                  |
| H3K36me3                | 13                 | 5                     | 2.60                   |
| H3K9me3                 | 32                 | 22                    | 1.45                   |
| H3K27me3                | 22                 | 2                     | 11.00                  |
| Bivalent                | 13                 | 1                     | 13.00                  |
| Enhancers               | 166                | 60                    | 2.77                   |
| CpG Islands             | 7419               | 42                    | 176.64                 |
| CTCF                    | 1232               | 96                    | 12.83                  |
| Total Dppa4 Peaks       | 8319               | 8319                  | --                     |

**Supplemental Table 3. Overlap of Dppa4 binding and chromatin domains in mESC**

| <b>Chromatin Domain</b> | <b>Dppa4 Peaks</b> | <b>Random Regions</b> | <b>Fold Enrichment</b> |
|-------------------------|--------------------|-----------------------|------------------------|
| H3K4me3                 | 10487              | 425                   | 24.66                  |
| H3K4me2                 | 13171              | 961                   | 13.70                  |
| H3K4me1                 | 8763               | 1169                  | 7.50                   |
| H3K27ac                 | 4218               | 399                   | 10.57                  |
| H3K79me2                | 587                | 93                    | 6.31                   |
| H3K36me3                | 508                | 179                   | 2.83                   |
| H3K9me3                 | 166                | 33                    | 5.08                   |
| H3K27me3                | 2675               | 118                   | 22.73                  |
| Bivalent                | 1714               | 63                    | 27.21                  |
| Enhancers               | 135                | 367                   | 0.37                   |
| DNaseI hypersensitive   | 6923               | 560                   | 12.36                  |
| CpG Islands             | 8046               | 123                   | 65.24                  |
| Total Dppa4 Peaks       | 27489              | 27489                 | --                     |

**Supplemental Table 4. Overlap of Dppa4 binding and chromatin domains in P19 cells**

| <b>Chromatin Domain</b> | <b>Dppa4 Peaks</b> | <b>Random Regions</b> | <b>Fold Enrichment</b> |
|-------------------------|--------------------|-----------------------|------------------------|
| H3K4me3                 | 5779               | 342                   | 16.90                  |
| H3K4me2                 | 9731               | 683                   | 14.25                  |
| H3K4me1                 | 5393               | 1544                  | 3.49                   |
| H3K27ac                 | 1279               | 123                   | 10.40                  |
| H3K9ac                  | 2195               | 163                   | 13.47                  |
| H3K27me3                | 246                | 24                    | 10.25                  |
| Bivalent                | 204                | 8                     | 25.5                   |
| Enhancers               | 211                | 54                    | 3.91                   |
| CpG Islands             | 6959               | 112                   | 62.1                   |
| Total Dppa4 Peaks       | 8319               | 8319                  | --                     |
